# Supplementary material
Source: Springer Nature journal article supplement (https://www.springermedizin.de/resource/supplementary/12865_2013_547_MOESM4_ESM.pdf/9428190)

control CSN1S1

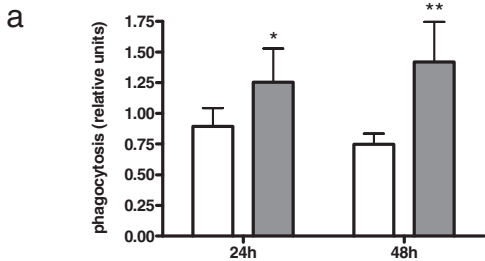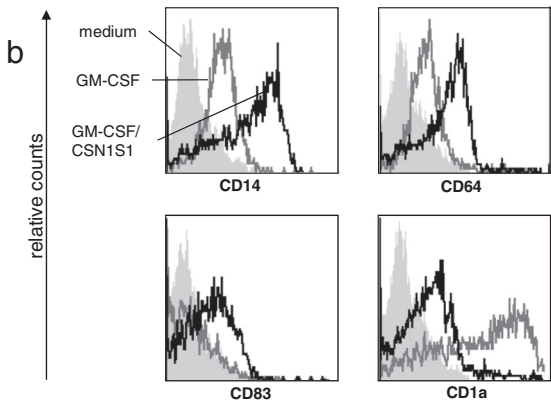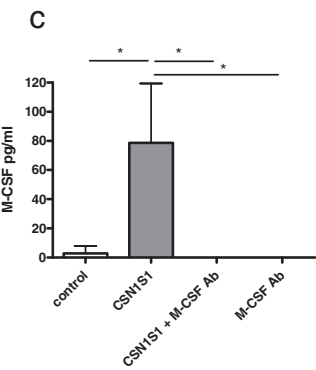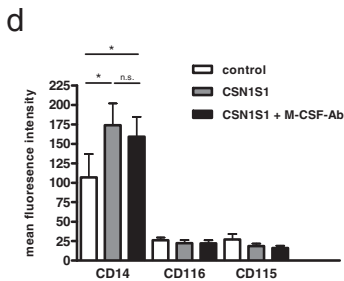

Supplement: MOESM4 [file 9428190]
